# Supplementary material
Source: Springer Nature journal article supplement (https://www.springermedizin.de/resource/supplementary/12882_2013_772_MOESM1_ESM.pdf/9454686)

**a****U-P**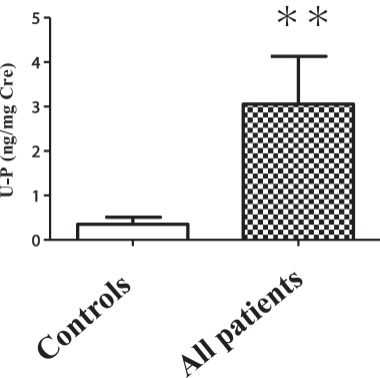**b****U-fH**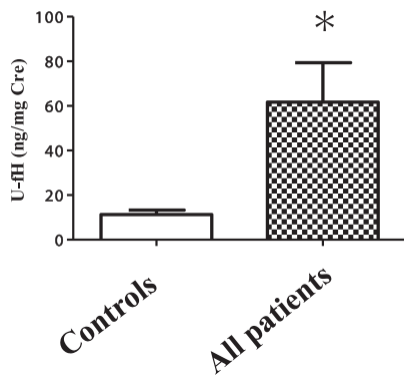**c****U-MAC**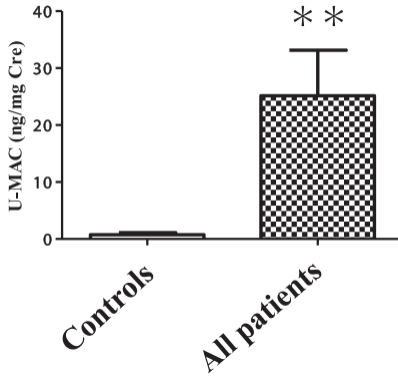

Supplement: MOESM1 [file 9454686]
